## STUDY PROTOCOL

# The effectiveness of Forensic Outpatient Systemic Therapy in the treatment of juvenile antisocial behavior: A study protocol of a Multiple Case Experimental Design

S. Marjolein van Cappellen<sup>1\*</sup>, Hanneke E. Creemers<sup>2</sup>, Larissa Hoogsteder<sup>2,3</sup>, Joan van Horn<sup>3</sup>, Jessica J. Asscher<sup>1</sup>

**1** Department of Clinical Child & Family Studies, Utrecht University, Utrecht, Netherlands, **2** Faculty of Social and Behavioral Sciences, University of Amsterdam, Amsterdam, Netherlands, **3** Outpatient Forensic Mental Health Care Center, De Waag, Utrecht

\* [s.m.vancappellen@uu.nl](mailto:s.m.vancappellen@uu.nl)

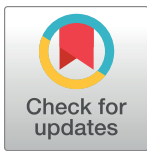

## OPEN ACCESS

**Citation:** van Cappellen SM, Creemers HE, Hoogsteder L, van Horn J, Asscher JJ (2024) The effectiveness of Forensic Outpatient Systemic Therapy in the treatment of juvenile antisocial behavior: A study protocol of a Multiple Case Experimental Design. PLoS ONE 19(4): e0298057. <https://doi.org/10.1371/journal.pone.0298057>

**Editor:** Vanessa Carels, PLoS ONE, UNITED STATES

**Received:** December 21, 2023

**Accepted:** January 3, 2024

**Published:** April 18, 2024

**Peer Review History:** PLOS recognizes the benefits of transparency in the peer review process; therefore, we enable the publication of all of the content of peer review and author responses alongside final, published articles. The editorial history of this article is available here: <https://doi.org/10.1371/journal.pone.0298057>

**Copyright:** © 2024 van Cappellen et al. This is an open access article distributed under the terms of the [Creative Commons Attribution License](https://creativecommons.org/licenses/by/4.0/), which permits unrestricted use, distribution, and reproduction in any medium, provided the original author and source are credited.

**Data Availability Statement:** No data generated or analyzed in this study. A data availability statement will be made available after study completion.

## Abstract

### Background

Juvenile antisocial behavior can have long-lasting and devastating effects for juveniles themselves, victims, and society. Evidence-based treatment is vital. Forensic Outpatient Systemic Therapy (Forensische Ambulante Systeem Therapie; FAST) is a promising treatment for juveniles showing severe antisocial behavior including aggression, (domestic) violence, and delinquent behavior. FAST has a flexible intensity and length, addresses individual and systemic risk and protective factors, and is responsive to the abilities of the client (system), intervention characteristics all considered crucial for effective treatment. The current study will investigate whether FAST is effective in reducing aggression of the juvenile, reaching client formulated subgoals, and improving family functioning. Processes of change will be examined, as well as mediation by reaching client formulated subgoals and improved family functioning.

### Methods

A Multiple Case Experimental Design (MCED) with an ABC design will be performed (A = baseline, B = intervention, and C = follow-up). Juveniles with primary aggression and/or anger problems ( $N = 15$ ) and their caregiver(s) will be recruited. Data collection will consist of self-report questionnaires and case file analysis. Participants fill out frequent short self-report questionnaires (twice a week during phase A, every other week during phase B, and every week during phase C) and two main questionnaires at the start of the intervention and immediately after intervention end, thereby covering a period of 5 to 11 months. Both visual and statistical analyses will be performed.

### Discussion

This study will generate robust knowledge and inform clinical practice on the effectiveness, processes of change, and mediating mechanisms of FAST, aiming to improve the treatment of future families within youth forensic care.

**Funding:** J.A., H.C., L.H. and J.v.H. obtained the funding for the study. The study is funded by ZonMw ([www.zonmw.nl](http://www.zonmw.nl)), the Dutch organisation for Health Research and Development, grant number: 60-63600-98-11138. The funder had no role in study design, data collection and analysis, decision to publish, or preparation of the manuscript.

**Competing interests:** Larissa Hoogsteder is program developer of Forensic Outpatient Systemic Therapy (FAST). There are no competing interest to declare for Marjolein van Cappellen, Hanneke Creemers, Joan van Horn, and Jessica Asscher. This does not alter our adherence to PLOS ONE policies on sharing data and materials.

## Trial registration

This trial was registered at ClinicalTrials.gov on 28/08/2023, protocol ID 60-63600-98-1138a.

## Introduction

Juvenile antisocial behavior, including aggression, (domestic) violence, and delinquent behavior such as threatening, assault, property crime, and substance and weapon offences [1], can have long-lasting and devastating effects for victims [2, 3] and perpetrators. Victims experience long-lasting damaging consequences such as feelings of unsafety [4] and are at increased risk of developing social emotional problems [5, 6]. Juveniles exhibiting antisocial behavior have a heightened risk of out of home placement, delinquency, and recidivism [7]. They are less likely to have stable living situations, work environments, and relationships [8], induce high societal costs, and negatively affect societal safety [9]. Considering the long-lasting personal and societal consequences of juvenile antisocial behavior [8–10], evidence-based treatment is vital for not only the juveniles and their systems but also for society. Although various intervention programs are available for this target group, these programs generally do not achieve substantial and long-lasting effects in the reduction of antisocial behavior and recidivism [11, 12].

Forensic Outpatient Systemic Therapy (in Dutch: Forensische Ambulante Systeem Therapie; FAST) is an outpatient systemic intervention for juveniles (aged 12–21 years) who show antisocial behavior and their families, developed to (1) reduce juvenile antisocial and/or delinquent behavior; (2) prevent out of home placement; and (3) prevent or decrease recidivism (risk) [13]. Based on Bronfenbrenner's socio-ecological theory [14], FAST aims to reach intervention goals by targeting juvenile, family, and systemic factors associated with the development and continuation of antisocial behavior, using components that originate from system therapy, cognitive behavioral therapy, aggression regulation therapy, and non-violent resistance.

In addition, FAST aims to be very adherent to the Risk Needs Responsivity (RNR) principles [15]. The RNR model states that, to be effective, interventions should adhere to several principles, among which the RNR are most important: (1) the risk principle: the intensity of the treatment should be adjusted to the recidivism risk; (2) the needs principle: the treatment should target the dynamic individual criminogenic needs; and (3) the (specific) responsivity principle: the treatment needs to be responsive to the abilities of the client (system) and needs to apply interventions that are effective in the target group. FAST has a flexible intensity and length, addresses risk and protective factors within the broad social context of a client system, and is responsive to the abilities of the client (system). In addition, if needed, FAST can be combined with other interventions to address specific individual risk factors of the client (system).

Previous pre-posttest studies showed that FAST resulted in positive changes on the desired outcomes: FAST had a large effect in reducing general recidivism risk, a moderate effect in decreasing problems in the emotional/personal functioning of the juvenile, and a small to moderate effect in improving family functioning [16]. However, more robust studies are needed to be able to attribute these results to the program offered. In addition, processes of change and the theorized mediators, i.e., whether changes in dynamic risk and protective factors result in decreased antisocial behavior, have not yet been investigated.

## Intervention subgoals

Based on both the RNR model [15] and the socio-ecological model [14], FAST subgoals have been formulated based on the dynamic risk and protective factors at the level of the individual,

family, and the broader system of the juvenile to reach intervention goals. At the individual level, FAST aims to target juvenile criminogenic risk factors related to psychological functioning such as cognitive distortions [17–19] and low executive functions such as cognitive flexibility, inhibition [20, 21] and coping skills [22, 23]. In addition, FAST aims to effectuate adequate daytime activities [18, 24]. At the family level, FAST aims to improve family functioning, by increasing caregiver-juvenile relationship quality [25, 26] and caregiver behavior [27], and by decreasing caregiver-juvenile conflict [28]. At the level of the broader system, FAST aims to promote social support [29, 30], reduce interaction with deviant peers [31, 32], and decrease truancy [33].

## Aims of the study

The current protocol paper describes a Multiple Case Experimental Design (MCED) study investigating the effectiveness of FAST. The aim of the MCED is to investigate the effectiveness of FAST in reaching its primary intervention goal, i.e., reducing aggression, in reaching client formulated subgoals, and in improving family functioning (i.e., reducing juvenile-caregiver conflict and increasing caregiver responsiveness). In addition, the aim is to investigate processes of change within FAST, i.e., the onset, variability, trend, slope, and sequence of change [34] of the intervention (sub)goals. Further, the aim is to investigate whether reaching client formulated subgoals and improving family functioning indeed function as mediators in the effectiveness of FAST, i.e., whether they contribute to decreases in aggression [13].

Client formulated subgoals measure to what extent the FAST subgoals clients want to achieve during intervention are achieved. In addition, for all families, the FAST subgoal of improving family functioning will be investigated, by examining juvenile-caregiver conflict and caregiver responsiveness [13]. Both constructs have been shown to be crucial in achieving change in family functioning, and proposedly result in a decrease of aggression. Patterson [35] proposed that caregiver-juvenile conflict involves coercive interaction cycles that lead to the development of juvenile conduct problems. Indeed, longitudinal studies have shown caregiver-juvenile conflict to predict juvenile antisocial behavior [36] and aggression [37]. In addition, multiple (meta-analytic) reviews have shown that lower caregiver responsiveness (i.e., feeling insufficiently equipped in parenting skills) is associated with increased externalizing behavior of juveniles [38, 39], especially for samples of older children [38].

The hypotheses are that (1) FAST is effective in reducing aggression; (2) FAST is effective in reaching client formulated subgoals; (3) FAST is effective in improving family functioning (i.e., decreasing juvenile-caregiver conflict and increasing caregiver responsiveness); and (4) improvements in client formulated subgoals and family functioning mediate FAST effectiveness.

In addition to (quasi) experimental studies, MCEDs are increasingly used to study intervention effectiveness in youth populations [40]. The current study is part of a larger research project to determine the effectiveness of FAST and complements a randomized controlled trial (RCT) [41] because of several design-specific benefits. First, MCEDs can capture within-person changes and intervention effects [40] that might not be detected using group-level analyses [42, 43]. Individual variability in response to treatment seems overlooked in group-level studies on youth interventions [44], highlighting the importance of combining group-level studies with MCEDs. Second, MCEDs allow a precise study of processes of change [45]. The multiple assessment points of an MCED allow detailed documentation [46] to examine the onset, variability, trend, and slope of change and the sequence of changes across different constructs [34]. In addition, the frequent measurements allow monitoring of micro-processes, whilst increasing ecological validity by reducing recall bias [47, 48]. Thereby, MCEDs allow the

identification of small behavioral or mental changes. Third, the multiple measurements within each phase of the MCED design allow for a relatively small sample size [45]. Fourth, the design allows to assess if the intervention effect and mediating mechanisms vary between participants, and therefore to what extent effects and mechanisms can be generalized to other cases [44]. Previous MCED intervention studies have found individual differences in the processes of change [49–51], substantiating the importance of utilizing this design in intervention research.

## Methods

### Design

An ABC design will be used with at least five assessment points per phase [45]. Phase A (baseline) covers the first 3–5 weeks of FAST during which the preconditions to enter treatment are created. For all families this part involves a focus on risk management, and for some families it involves a focus on exploratory diagnostics. Phase B covers the subsequent period of 2–8 months, starting with preliminary treatment that is replaced by customized treatment once the treatment plan has been finalized. Phase C (follow-up) covers six weeks after intervention end. The study has a multi-informant (juveniles and caregivers) design. Participants complete short questionnaires during phases A, B, and C with varying frequency: twice a week during phase A, every other week during phase B, and every week during phase C. Additionally, participants fill out two more elaborate questionnaires at the start of FAST and after finishing FAST, and case-file analysis is conducted. The study was registered at ClinicalTrials.gov on 28/08/2023 (protocol ID 60-63600-98-1138a). See Fig 1 for the SPIRIT schedule of enrollment, interventions, and assessments, Fig 2 for a conceptual model of the study design, and S1 Checklist for the SPIRIT checklist.

### Setting

FAST is offered by de Waag, an outpatient forensic mental health care center in the Netherlands with 12 treatment sites. Clients are referred by the juvenile justice system or voluntarily by mental healthcare professionals, school care coordinators, and general practitioners. FAST therapist teams at seven treatment locations will approach participants for the study. Participant recruitment started on September 26<sup>th</sup> 2023. Participants will be recruited until August 2024. The expected complete date range for participant recruitment and follow-up is September 26<sup>th</sup> 2023 to July 2025.

### Participants

It is currently unknown how many case series should be included in an MCED study to provide evidence of intervention effectiveness [52]. Numbers range from 3 [53] to 9 [54] or 10 case series [55]. Therefore, complete data will be collected for at least  $N = 10$  families. Taking drop-out of treatment and/or the study into account,  $N = 15$  juveniles and their caregiver(s) will be recruited. The target group of FAST is diverse in terms of (comorbid) problems, but approximately 93% of the referred juveniles has a behavioral disorder [13] and they often grow up in families with multiple and complex problems. In FAST, 75% of juveniles is male.

**Inclusion and exclusion criteria.** FAST therapists assess whether clients meet the inclusion and exclusion criteria of FAST during the standard intake procedure of FAST. The FAST inclusion criteria are: (1) Juvenile has an estimated IQ-score of 80 or higher and/or sufficient adaptive skills to benefit from FAST; (2) Juvenile is aged 12 to 21 years old at the start of the intervention; (3) Juvenile exhibits externalizing behavior resulting in problems in at least two life areas (family, school, or leisure time), determined by clinical impressions based on

| TIMEPOINT                                                                                                                                                                                                                                | STUDY PERIOD                    |            |                 |                    |                 |                              |
|------------------------------------------------------------------------------------------------------------------------------------------------------------------------------------------------------------------------------------------|---------------------------------|------------|-----------------|--------------------|-----------------|------------------------------|
|                                                                                                                                                                                                                                          | Enrollment                      | Allocation | Post-allocation |                    |                 | Close-out                    |
|                                                                                                                                                                                                                                          | $-t_1$                          | $t_0$      | $t_1$           | $t_2$              | $t_3$           | $t_x$                        |
|                                                                                                                                                                                                                                          | Baseline eligibility assessment |            | Baseline phase  | Intervention phase | Follow-up phase | Post-intervention assessment |
| <b>ENROLLMENT</b>                                                                                                                                                                                                                        |                                 |            |                 |                    |                 |                              |
| Eligibility screen                                                                                                                                                                                                                       | X                               |            |                 |                    |                 |                              |
| Informed consent                                                                                                                                                                                                                         | X                               |            |                 |                    |                 |                              |
| Allocation                                                                                                                                                                                                                               |                                 | X          |                 |                    |                 |                              |
| <b>INTERVENTION</b>                                                                                                                                                                                                                      |                                 |            |                 |                    |                 |                              |
| Forensic Outpatient Systemic Therapy                                                                                                                                                                                                     |                                 |            | ↔               |                    |                 |                              |
| <b>ASSESSMENTS</b>                                                                                                                                                                                                                       |                                 |            |                 |                    |                 |                              |
| Short questionnaires<br><i>(aggression, family functioning, client formulated subgoals, additional criminogenic needs)</i>                                                                                                               |                                 |            | X               | X                  | X               |                              |
| Elaborate questionnaires<br><i>(externalizing behavior, delinquency, substance use, contact with deviant peers, social support, family functioning, cognitive distortions, demographics, psychopathology, treatment characteristics)</i> |                                 |            | X               |                    | X               |                              |
| Case file analysis<br><i>(out of home placement, recidivism risk, substance use, client formulated subgoals, treatment characteristics)</i>                                                                                              |                                 |            |                 |                    |                 | X                            |

Fig 1. SPIRIT schedule of enrollment, interventions, and assessments.

<https://doi.org/10.1371/journal.pone.0298057.g001>

information from intake and/or referrer information; (4) Juvenile has a medium to high recidivism risk, measured by the Risk Assessment Instrument for Outpatient Forensic Mental Health Care Youth (RAF GGZ Youth) [56]; (5) Presence of juvenile-caregiver relationship problems, measured by the RAF GGZ Youth; (6) Juvenile has a diagnosis of a DSM-5 behavioral disorder, which is determined using a new diagnostic process or case file analysis; (7) Juvenile and caregiver(s) cannot be motivated to follow treatment at the treatment site after multiple attempts by the therapist; and (8) Juvenile resides with their caregiver(s) or is expected to return to residing with their caregiver(s) within the first two months of FAST. The FAST exclusion criteria are: (1) Juvenile exhibits severe psychiatric symptoms requiring

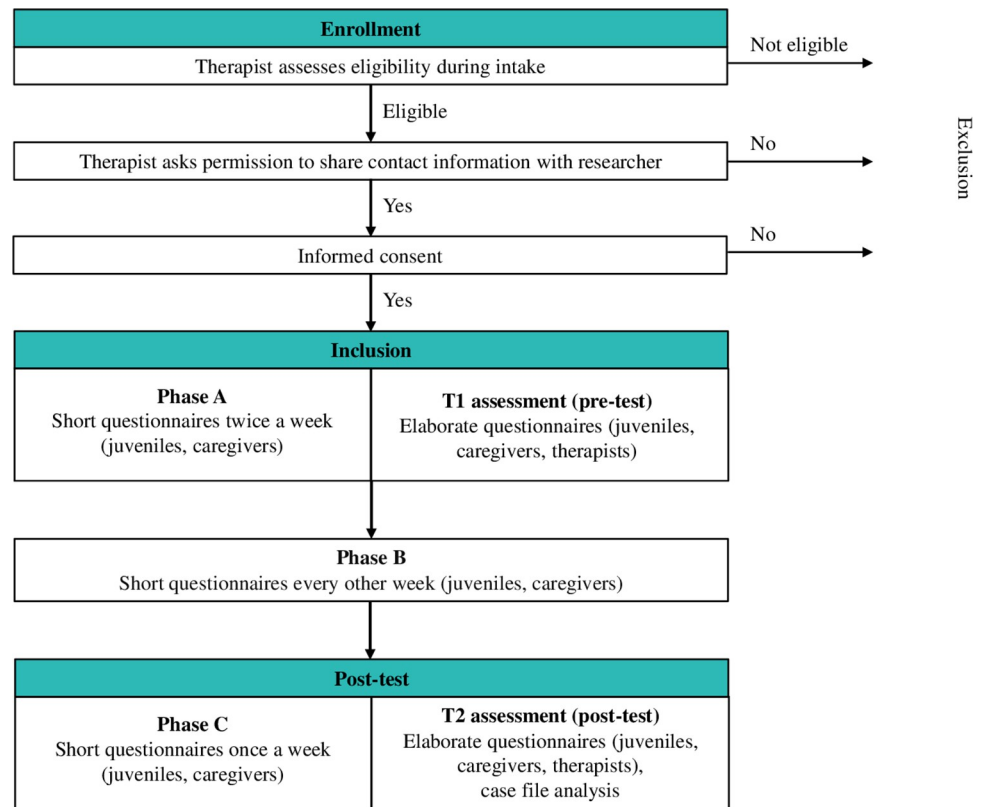

**Fig 2. Conceptual model of study design.**

<https://doi.org/10.1371/journal.pone.0298057.g002>

admission; (2) Problem behavior of the juvenile is caused primarily by substance abuse problems, and it is expected that treatment of the substance abuse problems will decrease the problem behavior; and (3) The safety of the family members or therapist cannot be sufficiently guaranteed.

To be eligible for participation in this specific study, one modified study inclusion criterium applies, i.e., the juvenile has primary aggression and/or anger problems (approximately 80% of referred juveniles). Thereby, juveniles exhibiting primarily sexually transgressive behavior, truancy, or property crimes are excluded from the study. In addition, one study exclusion criterium applies, i.e., the juvenile is in secure residential care or confined in a correctional or detention facility at the start of the intervention.

## Procedure

During intake, therapists evaluate whether clients meet the eligibility criteria and ask juveniles and/or caregiver(s) permission to share their contact details with the researcher. If they agree, FAST clients will be approached by the main researcher or research assistants, whom all have signed a non-disclosure agreement and provided a certificate of conduct, and receive verbal and written information about the study. The researcher obtains written informed consent from juveniles and caregivers for own participation, and from caregiver(s)/legal representative(s) for juveniles younger than 16 years.

During the study, participants fill out short questionnaires that contain approximately 37 items, taking about six minutes [57]. In addition, participants (juveniles and caregivers) complete two more elaborate questionnaires (30 minutes): prior to, or during the first weeks of



intervention (pre-test; T1) and immediately after intervention (post-test; T2). These data are used for more extensive assessment at the start and end of the intervention and to assess background information of participants. Therapists fill out two questionnaires (5 minutes) at T1 and T2, providing background information on therapist characteristics. Further, case file analysis will be used to retrieve information on the primary diagnosis of the juveniles, out of home placement, and questionnaires that are filled out as part of the standard FAST procedure by juveniles, caregivers, and therapists.

Given the complexity of the problems the target group faces, which often adversely affects their motivation to participate in treatment or research, the data collection is adjusted to the preferences and agenda of the participants for timing and location (e.g., by (video) phone calls or at the homes of the families). Trained research assistants are available to assist with filling out the questionnaires, e.g., by taking them in interview form. Participants receive financial compensation for filling out the questionnaires: 2.50 euros per short questionnaire and 15 euros per elaborate questionnaire. When completing all measurements, participants receive an average total of 95 euros.

## Intervention

The treatment stage of FAST lasts five to nine months depending on the individual goals of the juvenile and the caregiver(s) and is followed by a period of aftercare. For more information on the treatment stages of FAST, see van Cappellen et al. [41]. At the start of treatment, therapists write an individualized basic Empirical Intervention cycle Summary (EIS). In the basic EIS, a problem analysis or function analysis of the problem behavior is described. The recidivism risk is determined, and the safety of the juvenile, caregiver(s), and therapists and the degree of motivation are described. The basic EIS describes which FAST subgoals need to be targeted to realize the main goal of FAST, as agreed upon between therapist, juvenile, and caregiver(s). During treatment, therapists evaluate the EIS every two weeks with the juvenile and the caregiver(s) and discuss which general and optional FAST subgoals have the most priority. Interventions are selected based on the chosen subgoals and by applying analysis circles. An analysis circle is created around a problem that is related to the chosen FAST subgoal: On the right side of the circle, the influencers that contribute negatively to the problem behavior, or increase the problem behavior are described; on the left side of the circle, the influencers that reduce the problem behavior are described. Influencers can originate from various systems around the juvenile and family and are introduced by the juvenile and caregiver(s) themselves. When it is determined that the chosen subgoals are reached, new goals are prioritized and new analysis circles are made. During treatment, the following supplementary modules can be selected for individual treatment: Stress and anger reduction, Impulse control, Self-control, Perceiving and interpreting correctly, Emotion regulation, and Self-image. Every two months an evaluation takes place to determine whether longer treatment is needed, with a maximum of nine months. In the last stage of the treatment, a future plan is developed that aims to prevent relapse.

The level of program integrity, indicating whether treatment is delivered according to the method and treatment manuals, can affect treatment results [58, 59]. Within FAST, treatment integrity is monitored closely. Every FAST therapist has succeeded the FAST basic training and offers FAST minimally 20 hours per week. Each team has weekly FAST team meetings, during which treatments are monitored by evaluating the EIS' and a bi-monthly treatment checklist, guided by an appointed supervisor who is responsible for treatment integrity. At the end of the treatment, the FAST evaluation forms are completed by juveniles, caregivers, and therapists to verify compliance with the most essential FAST methods and techniques. FAST

**Table 1. Concepts, instruments, and respondents of the short assessments.**

| Concept                    | Instrument     | Respondent |           |
|----------------------------|----------------|------------|-----------|
|                            |                | Juvenile   | Caregiver |
| Aggression                 | YSR            | x          |           |
|                            | CBCL           |            | x         |
| Family functioning         | NRI            | x          | x         |
|                            | NPQ            | x          | x         |
| Client formulated subgoals | FAST Goal list | x          | x         |

YSR = Youth Self Report; CBCL = Child Behavior Checklist; NRI = Network of Relationship Inventory; NPQ = Nijmegen Parenting Questionnaire.

<https://doi.org/10.1371/journal.pone.0298057.t001>

includes around 3 hours of face-to-face direct treatment time weekly and consists of a maximum of 10% online direct treatment time (i.e., treatment via phone, video-calling, or texting).

## Measures

The data collection and measures used in the elaborate questionnaires and case-file analysis are described in detail in the study protocol of our RCT [41]. The short questionnaires contain approximately 37 items (see below). All items on the short questionnaires are answered on a Visual Analog Scale (VAS) ranging from 0 to 100, as this is a more sensitive way to measure change [57]. To reduce the likelihood of a learning effect, question order will be randomized for each measurement. An overview of the various constructs, instruments, and respondents of the short assessments is presented in Table 1.

## Aggression

Aggression will be measured using the Aggressive Behavior scales of the Youth Self Report (YSR) [60] and the Child Behavior Checklist (CBCL) [61]. Both scales consist of 19 items. Example items are “I lie or cheat” for the YSR and “Lying or cheating” for the CBCL.

## Client formulated subgoals

Client formulated subgoals will be measured using the FAST Goal list, which consists of 21 items asking respondents to rate their current functioning on the general primary and secondary goals of FAST. An example item is “I receive sufficient support from people close to me (acquaintances, friends, or family)”. The FAST Goal lists are used in an idiographic approach [62]. The first short questionnaire contains the entire FAST Goal list, and a follow-up question asks participants to select the top three FAST goals they will be working on during FAST as discussed with their therapist during intake. In the subsequent measurements, only the items measuring the three prioritized goals are administered. Added to these three items, a fourth item measures whether prioritization or goals have changed. If so, the participant is asked to state their new prioritization or goals, and the questions about the new goals are added to the subsequent measurements.

## Family functioning

Juvenile-caregiver conflict will be measured using the adolescent and parent versions of the Network of Relationship Inventory (NRI) [63], containing six items. An example item is “How much do you and your parents disagree or argue with each other?” for juveniles and “How much do you and your child disagree or argue with each other?” for caregivers. Caregiver responsiveness will be measured using the Nijmegen Parenting Questionnaire (NPQ) [64],



containing eight items. An example item is “If I’m sad or worried about something, my caregiver notices” for juveniles and “If my child is sad or worried about something, I notice it” for caregivers.

### **Additional criminogenic needs**

If severe truancy, substance use, contact with deviant peers, or delinquent behavior is reported at T1 but not prioritized in the top three goals, single items will be administered on these problems as well. For example, if the juvenile reports severe substance use in the T1 questionnaire, but reducing substance use is not identified as a goal in the prioritization of client formulated subgoals, an item of the Peilstation Middelengebruik [65] is added. An example item is “How many times have you used weed in the past two weeks?”

### **Data management**

Contact data are stored in a digital double encrypted database. Research data are stored and analyzed in separate files, without direct links to the participants. Participants fill in questionnaires on paper or online using personalized links from the online survey tool of Utrecht University (Qualtrics). All completed paper documents are stored secured at Utrecht University and will be scanned and directly stored on YODA, a research data management service that is compliant to the guidelines of the General Data Protocol Regulation. Completed paper questionnaires will additionally be entered into Qualtrics. Information from case file analysis will be coded into SPSS or JASP files. All data will be stored directly on YODA and only the researchers involved in this study have access to the data.

### **Plan of data analysis**

The methods of analyzing MCED data are developing rapidly [66]. The current best practice suggests combining visual analysis with statistical analyses [45, 67], but there is no consensus about which statistical analyses are best [66]. Based on currently available knowledge, we expect to perform visual analysis following the systematic protocol of Wolfe et al. [68] and statistical analyses using simulation modeling analysis (SMA) [69], as it is suitable with a relatively small number of observations per phase (i.e.,  $N < 30$ ) [70]. A bootstrapping method enables the analysis of variable changes across phases while accounting for autocorrelation. Pearson correlations will be calculated across phases per variable and per participant for level changes (i.e., changes in mean levels) and slope changes (i.e., changes in data patterns). In addition, cross-lagged correlations within phase will be investigated [70]. The Percentage of Non-overlapping Data will be provided for clinically relevant level changes (i.e.,  $> 80\%$ ) [71] and a Bonferroni correction will be applied to adjust for multiple comparisons.

### **Discussion**

This study protocol describes an MCED investigating the effectiveness of FAST in reducing aggression of juveniles with antisocial behavior, achieving client formulated subgoals, and improving family functioning. In addition, change processes will be examined by investigating the onset, variability, trend, slope, and sequence of change of the intervention (sub)goals, and mediation by reaching client formulated subgoals and improved family functioning will be assessed. The hypotheses are that (1) FAST is effective in reducing aggression; (2) FAST is effective in reaching client formulated subgoals; (3) FAST is effective in improving family functioning (i.e., decreasing juvenile-caregiver conflict and increasing caregiver

responsiveness); and (4) improvements in client formulated subgoals and family functioning mediate FAST effectiveness.

In the data collection of this study, we anticipate several challenges. One will be receiving informed consent from participants quickly to have sufficient measurements in the baseline phase (phase A). A second challenge will be the recruitment and retainment of  $n = 15$  FAST clients over a period of 5 to 11 months, as the target group is generally hard to reach and motivate for research. During the data collection of our other studies on the effectiveness of FAST [41], families voice to be overloaded by the multiple problems they experience in their daily lives. Because FAST is (necessarily) an intensive treatment program, families can experience the additional burden of participating in scientific research as being too high. The frequent and prolonged measurements that are essential in the MCED design might therefore discourage participation. The current study thus requires special attention for the recruitment and retainment of the families. First, it will be key to adapt our data collection as much as possible to the needs and wants of the participants. As we do in our other studies [41], we will adjust the timing, the location, and the way of completing the measurements to their preferences. In addition, to contribute to the formation of a good working relationship, we will try to let the same researcher conduct all assessments with a participant [72]. We will compensate participants financially for each completed measurement, as this increases motivation to participate [73, 74]. Second, conducting scientific research with this target group requires a strong collaboration with clinical practice and therapists [72]. As we have already started conducting an RCT investigating the effectiveness of FAST [41], we have established a strong collaboration with the participating therapist teams. We will continue to put effort and time into our collaboration.

The proposed MCED study meets nearly all quality criteria in the existing guidelines [53], but a limitation of our study design is that the ABC design does not include systematically manipulated baselines across families, as the duration of phase A is determined by the therapist. This poses potential threats to the internal validity of our results [45]. However, as highlighted in the article of Kratochwill et al. [45], conducting an extended baseline is unethical when participants exhibit behavior that is dangerous to the participants themselves or others [75]. As the target group of the current study exhibits severe antisocial behavior which poses risk for themselves, their surroundings, and society and requires immediate treatment, extending the baseline phase can be seen as an unacceptable risk. We have designed this MCED study in a way that makes it safe to conduct in the reality of clinical practice and that increases external validity.

Despite this limitation and the potential challenges, the current study has several important strengths. First, the MCED design has several strengths (see [Introduction](#)). Most importantly, the design allows to study the within-person intervention effects [44] and possible individual variability in processes of change [45] during the course of FAST. Second, the study uses an idiosyncratic measure of client formulated subgoals. Thereby, it measures treatment effect on the problems clients have discussed with their therapist to be the most important. Additionally, this approach provides a complementary and more specific measurement of problems than the more broad and generic measurement in standardized assessment [62]. Third, the multi-informant (juveniles and caregivers) design of the study allows us to compare the reports of juveniles and caregivers on intervention effectiveness and course. This seems especially important in youth intervention research, as the points of view of juveniles and caregivers can differ considerably [62]. Fourth, after affirming that the sample of FAST clients in this MCED study is representative of the bigger sample of clients that participate in our RCT or quasi-experimental study, we will be able to infer whether the processes of change and mediating mechanisms of FAST that are found in this study also apply to the larger FAST target group.

This study will improve knowledge on potential within-person processes of change, including mediations, in a systemic intervention targeting juvenile antisocial behavior and their multi-problem families. Next to investigating whether and how improving family functioning contributes to a decrease in aggression [38, 39], this study will investigate if, how, and in what order client subgoals formulated at the beginning of the intervention are reached, and whether improvements contribute to decreases in aggression. Thereby, this study will allow to assess whether intervention customization, in the form of adjusting the intervention subgoals to the specific criminogenic factors present in the client system [13], indeed contributes to intervention effectiveness and what the underlying processes of change are. Further, the examination of change processes on an individual level can inform clinical practice on what course of change to expect during intervention. Following, clients can be informed and questions can be answered based on evidence: When will change likely occur? What process of change can be expected: Is change stable or variable? Is it worth investing in a specific client formulated subgoal first to reach the main goal, i.e., a decrease in aggression? This knowledge might help to motivate families to push through the difficult times of intervention, or to invest in specific intervention goals. In short, the results of this study will yield knowledge on the processes of change and mediators of FAST, potentially contributing to evidence-based decision making in clinical practice, informing families and therapists on what to expect during treatment.

## Conclusion

The present MCED study aims to investigate the effectiveness, change processes, and mediating mechanisms of FAST. Evidence-based treatment for juveniles with antisocial behavior is crucial for juveniles themselves, for their families, and for society. This MCED will allow us to generate robust knowledge to inform clinical practice on which processes of change, including mediators, contribute to the effectiveness of systemic interventions targeting juveniles with antisocial behavior on an individual level. Thereby, the results potentially improve the treatment of future families within youth forensic care.

## Supporting information

**S1 Checklist. SPIRIT 2013 checklist: Recommended items to address in a clinical trial protocol and related documents\*.**

(PDF)

**S2 Checklist. TREND statement checklist.**

(PDF)

## Acknowledgments

We would like to thank de Waag for their full cooperation with this study.

## Author Contributions

**Conceptualization:** S. Marjolein van Cappellen, Hanneke E. Creemers, Larissa Hoogsteder, Joan van Horn, Jessica J. Asscher.

**Funding acquisition:** Hanneke E. Creemers, Larissa Hoogsteder, Joan van Horn, Jessica J. Asscher.

**Investigation:** S. Marjolein van Cappellen.

**Project administration:** S. Marjolein van Cappellen.

**Supervision:** Hanneke E. Creemers, Larissa Hoogsteder, Jessica J. Asscher.

**Visualization:** S. Marjolein van Cappellen.

**Writing – original draft:** S. Marjolein van Cappellen.

**Writing – review & editing:** S. Marjolein van Cappellen, Hanneke E. Creemers, Larissa Hoogsteder, Joan van Horn, Jessica J. Asscher.

## References

1. Hoeve M, McReynolds LS, Wasserman GA, McMillan C. The influence of mental health disorders on severity of reoffending in juveniles. *Crim Justice Behav.* 2013. <https://doi.org/10.1177/0093854812459639>
2. Adrian M, Jenness JL, Kuehn KS, Smith MR, McLaughlin KA. Emotion regulation processes linking peer victimization to anxiety and depression symptoms in adolescence. *Dev Psychopathol.* 2019. <https://doi.org/10.1017/S0954579419000543> PMID: 31097052
3. Goemans A, Viding E, McCrory E. Child maltreatment, peer victimization, and mental health: neurocognitive perspectives on the cycle of victimization. *Trauma Violence Abuse.* 2021. <https://doi.org/10.1177/15248380211036393> PMID: 34355601
4. Janssen HJ, Oberwittler D, Koeber G. Victimization and its consequences for well-being: a between- and within-person analysis. *J Quant Criminol.* 2021. <https://doi.org/10.1007/s10940-019-09445-6>
5. Morelen D, Southam-Gerow M, Zeman J. Child emotion regulation and peer victimization: the moderating role of child sex. *J Child Fam Stud.* 2016. <https://doi.org/10.1007/s10826-016-0360-6>
6. Rudolph KD, Troop-Gordon W, Granger DA. Individual differences in biological stress responses moderate the contribution of early peer victimization to subsequent depressive symptoms. *Psychopharmacology.* 2011. <https://doi.org/10.1007/s00213-010-1879-7> PMID: 20505926
7. Wartna BJS, Tollenaar N, Verweij S, Timmermans M, Witvliet M, Homburg GHJ. Terugval in recidive. Exploratie van de daling in de recidivecijfers van jeugdigen en ex-gedetineerden bestraft in de periode 2002–2010. Wetenschappelijk Onderzoek- en Documentatiecentrum. 2014. Available from: <https://repository.wodc.nl/handle/20.500.12832/147>.
8. Piquero AR, Sullivan CJ, Farrington DP. Assessing differences between short-term, high-rate offenders and long-term, low-rate offenders. *Crim Justice Behav.* 2010. <https://doi.org/10.1177/0093854810382356>
9. de Koning J, Gravesteijn J, de Hek P, de Vries D. Kosten en baten van maatschappelijke(re-)integratie van volwassen en jeugdige (ex-)gedetineerden. SEOR Erasmus School of Economics. 2016. Available from: <https://repository.wodc.nl/handle/20.500.12832/2254>.
10. Brook JS, Lee JY, Finch SJ, Brown EN, Brook DW. Long-term consequences of membership in trajectory groups of delinquent behavior in an urban sample: violence, drug use, interpersonal, and neighborhood attributes. *Aggress Behav.* 2013. <https://doi.org/10.1002/ab.21493> PMID: 23813412
11. Fonagy P, Butler S, Cottrell D, Scott S, Pilling S, Eisler I, et al. Multisystemic therapy versus management as usual in the treatment of adolescent antisocial behaviour (START): 5-year follow-up of a pragmatic, randomised, controlled, superiority trial. *Lancet Psychiatry.* 2020. [https://doi.org/10.1016/S2215-0366\(20\)30131-0](https://doi.org/10.1016/S2215-0366(20)30131-0) PMID: 32353277
12. Van der Pol TM, Hoeve M, Noom MJ, Stams GJJ, Doreleijers TA, van Domburgh L, et al. Research Review: the effectiveness of multidimensional family therapy in treating adolescents with multiple behavior problems—a meta-analysis. *J Child Psychol Psychiatry.* 2017. <https://doi.org/10.1111/jcpp.12685> PMID: 28121012
13. Hoogsteder LM, Sweers N. Justitieleinterventies.nl: beschrijving Forensische Ambulante Systeem Therapie (FAST). Nederlands Jeugdinstituut, Movisie en Trimbos instituut. 2021. Available from: [www.justitieleinterventies.nl](http://www.justitieleinterventies.nl).
14. Bronfenbrenner U. The ecology of human development: experiments by nature and design. London: Harvard University Press; 1979.
15. Andrews DA, Bonta J. Rehabilitating criminal justice policy and practice. *Psychol Public Policy Law.* 2010. <https://doi.org/10.1037/a0018362>
16. Peels CE. De doeltreffendheid van Forensische Ambulante Systeem Therapie. Is FAST ook een geschikte systeembehandeling voor jongeren met ASS. M.Sc. Thesis, University of Amsterdam. 2021.
17. Schmits E, Glowacz F. Delinquency and drug use among adolescents and emerging adults: the role of aggression, impulsivity, empathy, and cognitive distortions. *J Subst Use.* 2019. <https://doi.org/10.1080/14659891.2018.1531945>

18. van der Put CE, Stams GJJM, Hoeve M, Deković M Spanjaard HJM, van der Laan PH, et al. Changes in the relative importance of dynamic risk factors for recidivism during adolescence. *Int J Offender Ther Comp Criminol*. 2012. <https://doi.org/10.1177/0306624X11398462> PMID: 21339209
19. Wallinius M, Johansson P, Lardén M, Dernevik M. Self-serving cognitive distortions and antisocial behavior among adults and adolescents. *Crim Justice Behav*. 2011. <https://doi.org/10.1177/0093854810396139>
20. Kleine Deters R, Naaijen J, Rosa M, Aggensteiner PM, Banaschewski T, Saam MC, et al. Executive functioning and emotion recognition in youth with oppositional defiant disorder and/or conduct disorder. *World J Biol Psychiatry*. 2020. <https://doi.org/10.1080/15622975.2020.1747114> PMID: 32212964
21. Van Nieuwenhuijzen M, Van Rest MM, Embregts PJCM, Vriens A, Oostermeijer S, Van Bokhoven I, et al. Executive functions and social information processing in adolescents with severe behavior problems. *Child Neuropsychol*. 2017. <https://doi.org/10.1080/09297049.2015.1108396> PMID: 26563817
22. Bell MA, Deater-Deckard K. Biological systems and the development of self-regulation: integrating behavior, genetics, and psychophysiology. *J Dev Behav Pediatr*. 2007. <https://doi.org/10.1097/DBP.0b013e3181131fc7> PMID: 18049327
23. Modecki KL, Zimmer-Gembeck MJ, Guerra N. Emotion regulation, coping, and decision making: three linked skills for preventing externalizing problems in adolescence. *Child Dev*. 2017. <https://doi.org/10.1111/cdev.12734> PMID: 28195431
24. Van der Laan AM, Blom M. WODC-monitor zelfgerapporteerde jeugdcriminaliteit. 2006. Available from <https://repository.wodc.nl/handle/20.500.12832/882>.
25. Cooley M, Wojciak AS, Farineau H, Mullis A. The association between perception of relationship with caregivers and behaviours of youth in foster care: a child and caregiver perspective. *J Soc Work Pract*. 2015. <https://doi.org/10.1080/02650533.2014.933405>
26. Yoder JR, Brisson D, Lopez A. Moving beyond fatherhood involvement: the association between father-child relationship quality and youth delinquency trajectories. *Fam Relat*. 2016. <https://doi.org/10.1111/fare.12197>
27. Lansford JE, Godwin J, Bornstein MH, Chang L, Deater-Deckard K, Di Giunta L, et al. Parenting, culture, and the development of externalizing behaviors from age 7 to 14 in nine countries. *Dev Psychopathol*. 2018. <https://doi.org/10.1017/S0954579418000925> PMID: 30132425
28. Smokowski PR, Bacallao ML, Cotter KL, Evans CBR. The effects of positive and negative parenting practices on adolescent mental health outcomes in a multicultural sample of rural youth. *Child Psychiatry Hum Dev*. 2015. <https://doi.org/10.1007/s10578-014-0474-2> PMID: 24880498
29. Benhorin S, McMahon SD. Exposure to violence and aggression: protective roles of social support among urban African American youth. *J Community Psychol*. 2008. <https://doi.org/10.1002/jcop.20252>
30. MacLeod J, Nelson G. Programs for the promotion of family wellness and the prevention of child maltreatment: a meta-analytic review. *Child Abuse Negl*. 2000. [https://doi.org/10.1016/s0145-2134\(00\)00178-2](https://doi.org/10.1016/s0145-2134(00)00178-2) PMID: 11057701
31. Denkers A, de Jong JD. Delinquentie, vrienden en 'boosheid met liefde.' *Tijdschr Criminol*. 2020. <https://doi.org/10.5553/tvc/0165182x2020062203008>
32. Hoeben EM, Meldrum RC, Walker D, Young JTN. The role of peer delinquency and unstructured socializing in explaining delinquency and substance use: a state-of-the-art review. *J Crim Justice*. 2016. <https://doi.org/10.1016/j.jcrimjus.2016.08.001>
33. Rocque M, Jennings WG, Piquero AR, Ozkan T, Farrington DP. The importance of school attendance: findings from the Cambridge Study in Delinquent Development on the life-course effects of truancy. *Crime Delinq*. 2017. <https://doi.org/10.1177/0011128716660520>
34. Horner RH, Swaminathan H, Sugai G, Smolkowski K. Considerations for the systematic analysis and use of single-case research. *Educ Treat Children*. 2012, <https://doi.org/10.1353/etc.2012.0011>
35. Patterson GR. *Coercive family process*. Eugene, OR: Castalia; 1982.
36. Klahr AM, Rueter MA, McGue M, Iacono WG, Burt SA. The relationship between parent-child conflict and adolescent antisocial behavior: confirming shared environmental mediation. *J Abnorm Child Psycho*. 2011. <https://doi.org/10.1007/s10802-011-9505-7> PMID: 21484334
37. Hofer C, Eisenberg N, Spinrad TL, Morris AS, Gershoff E, Valiente C, et al. Mother-adolescent conflict: stability, change, and relations with externalizing and internalizing behavior problems. *Soc Dev*. 2013. <https://doi.org/10.1111/sode.12012> PMID: 23729993
38. Cooke JE, Deneault A-A, Devereux C, Eirich R, Fearon RMP, Madigan S. Parental sensitivity and child behavioral problems: a meta-analytic review. *Child Dev*. 2022. <https://doi.org/10.1111/cdev.13764> PMID: 35357693



39. Schneider M, Falkenberg I, Berger P. Parent-child play and the emergence of externalizing and internalizing behavior problems in childhood: a systematic review. *Front Psychol*. 2022. <https://doi.org/10.3389/fpsyg.2022.822394> PMID: 35586226
40. Kazdin AE. Single-case experimental designs. Evaluating interventions in research and clinical practice. *Behav Res Ther*. 2019. <https://doi.org/10.1016/j.brat.2018.11.015> PMID: 30527785
41. van Cappellen SM, Creemers HE, Hoogsteder L, van Horn J, Dekovic M, Asscher JJ. The effectiveness of blended versus regular Forensic Outpatient Systemic Therapy in the treatment of juvenile antisocial behavior: a study protocol of a randomized controlled trial. *BMC Psychiatry*. 2023. <https://doi.org/10.1186/s12888-023-04831-8> PMID: 37143003
42. Maric M, Wiers RW, Prins PJM. Ten ways to improve the use of statistical mediation analysis in the practice of child and adolescent treatment research. *Clin Child Fam Psychol Rev*. 2012. <https://doi.org/10.1007/s10567-012-0114-y> PMID: 22418896
43. Schuurman NK. A “within/between problem” primer: about (not) separating within-person variance and between-person variance in psychology. *PsyArXiv*. 2023. <https://doi.org/10.31234/osf.io/7zgxk>
44. Maric M, Schumacher L, Van den Noortgate W, Bettelli L, Engelbertink W, Stikkelbroek Y. A multilevel meta-analysis of single-case research on interventions for internalizing disorders in children and adolescents. *Clin Child Fam Psychol Rev*. 2023. <https://doi.org/10.1007/s10567-023-00432-9> PMID: 37010669
45. Kratochwill TR, Horner RH, Levin JR, Machalicek W, Ferron J, Johnson A. Single-case intervention research design standards: additional proposed upgrades and future directions. *J Sch Psychol*. 2023. <https://doi.org/10.1016/j.jsp.2022.12.002> PMID: 36914365
46. Kratochwill TR, Hitchcock J, Horner RH, Levin JR, Odom SL, Rindskopf DM, et al. Single-case designs technical documentation. 2010. Available from [http://ies.ed.gov/ncee/wwc/pdf/wwc\\_scd.pdf](http://ies.ed.gov/ncee/wwc/pdf/wwc_scd.pdf).
47. Conner TS, Mehl MR. Ambulatory Assessment—methods for studying everyday life. In: Scott R, Kosslyn S, Pinkerton N, editors. *Emerging trends in the social and behavioral sciences*. Hoboken, NJ: Wiley; 2015.
48. Trull TJ, Ebner-Priemer U. The role of ambulatory assessment in psychological science. *Curr Dir Psychol Sci*. 2014. <https://doi.org/10.1177/0963721414550706> PMID: 25530686
49. Offermans JE, Duindam HM, Asscher JJ, Stams GJJ, Creemers HE. Brief report: the effectiveness of Dutch Cell Dogs: a multiple case experimental study. *Clin Child Psychol Psychiatry*. 2020. <https://doi.org/10.1177/1359104520940744> PMID: 32650678
50. Lohmann RC, Baker SB, Williams-DeVane CR. Effects of customized aggression reduction intervention with male adolescents: a single-case research design. *J Child Adolesc Couns*. 2023. <https://doi.org/10.1080/23727810.2023.2171678>
51. Stapleton A, Styne G, Cassidy S, McHugh L. Assessing acceptance and commitment therapy for adolescent mental health: single-case A-B design with high temporal density assessments. *J Contextual Behav Sci*. 2023. <https://doi.org/10.1016/j.jcbs.2023.06.011>
52. van de Schoot R, Miočević M, editors. *Small sample size solutions: a guide for applied researchers and practitioners*. London, England: Routledge; 2020.
53. Kratochwill TR, Hitchcock JH, Horner RH, Levin JR, Odom SL, Rindskopf DM, et al. Single-case intervention research design standards. *Remedial Spec Educ*. 2013. <https://doi.org/10.1177/0741932512452794>
54. American Psychological Association. Training in and dissemination of empirically validated psychological treatments: Report and recommendations. Division of Clinical Psychology, Task Force on Promotion and Dissemination of Psychological Procedures. *Clin Psychol*. 1995.
55. Sport Kenniscentrum & Beweging Movisie, Nederlands Centrum Jeugdgezondheid Nederlands Jeugdinstituut, Trimbos-instituut RIVM, Vilans. *Erkenning van interventies. Criteria voor gezamenlijke kwaliteitsbeoordeling 2019–2022*. 2021. Available from <https://www.ncj.nl/wp-content/uploads/media-import/docs/3aaa0842-80c8-413e-94db-bbe42ee7f2e8.pdf>.
56. Van Horn J, Wilpert J, Eisenberg M, Mulder J. Handleiding RAF GGZ Jeugd. Risicotaxatie-instrument voor de ambulante forensische GGZ. Utrecht: De Waag; 2013.
57. Van Roekel E, Keijsers L, Chung JM. A review of current ambulatory assessment studies in adolescent samples and practical recommendations. *J Res Adolesc*. 2019. <https://doi.org/10.1111/jora.12471> PMID: 31573762
58. Duwe G, Clark V. Importance of program integrity: outcome evaluation of a gender-responsive, cognitive-behavioral program for female offenders. *Criminol Public Policy*. 2015. <https://doi.org/10.1111/1745-9133.12123>



59. Pettigrew J, Graham JW, Miller-Day M, Hecht ML, Krieger JL, Shin YJ. Adherence and Delivery: implementation quality and program outcomes for the seventh-grade keepin' it REAL program. *Prev Sci*. 2015. <https://doi.org/10.1007/s11121-014-0506-y> PMID: 25274060
60. Verhulst FC, van der Ende J. Agreement between parents' reports and adolescents' self-reports of problem behavior. *J Child Psychol Psychiatry*. 1992. <https://doi.org/10.1111/j.1469-7610.1992.tb00922.x> PMID: 1400684
61. Verhulst FC, Koot JM, Akkerhuis GW, Veerman JW. *Praktische handleiding voor de CBCL*. Assen: Van Gorcum; 1990.
62. Weisz JR, Chorpita BF, Frye A, Ng MY, Lau N, Bearman SK, et al. Youth Top Problems: using idiographic, consumer-guided assessment to identify treatment needs and to track change during psychotherapy. *J Consult Clin Psychol*. 2011. <https://doi.org/10.1037/a0023307> PMID: 21500888
63. Furman W. The measurement of friendship perceptions: conceptual and methodological issues. In: Bukowski WM, Newcomb AF, editors. *The company they keep: friendship in childhood and adolescence*. Cambridge: Cambridge University Press; 1996. p. 41–65.
64. Gerris JRM, Vermulst AA, van Boxtel DAAM, Janssens JMAM, van Zuthphen RAH, Felling AJA. Parenting in Dutch families: a representative description of Dutch family life in terms of validated concepts representing characteristics of parents, children, the family a system, and parental socio-cultural value orientations. Nijmegen: University of Nijmegen; 1993.
65. Monshouwer K. Peilstationsonderzoek naar middelengebruik scholieren. Trimbos-instituut. 2020. Available from <https://www.trimbos.nl/kennis/feiten-cijfers-drugs-alcoholroken/peilstationsonderzoek/>.
66. Shadish WR. Analysis and meta-analysis of single-case designs: an introduction. *J Sch Psychol*. 2014. <https://doi.org/10.1016/j.jsp.2013.11.009> PMID: 24606971
67. Manolov R, Moeyaert M. Recommendations for choosing single-case data analytical techniques. *Behav Ther*. 2017. <https://doi.org/10.1016/j.beth.2016.04.008> PMID: 28077224
68. Wolfe K, Barton EE, Meadan H. Systematic protocols for the visual analysis of single-case research data. *Behav Anal Pract*. 2019. <https://doi.org/10.1007/s40617-019-00336-7> PMID: 31976257
69. Borckardt JJ. *Simulation modeling analysis: time series analysis program for short time series data streams*. Version 8.3.3. Charleston, SC: Medical University of South Carolina; 2006.
70. Borckardt JJ, Nash MR, Murphy MD, Moore M, Shaw D, O'Neil P. Clinical practice as natural laboratory for psychotherapy research: a guide to case-based time-series analysis. *Am Psychol*. 2008. <https://doi.org/10.1037/0003-066X.63.2.77> PMID: 18284277
71. Scotti JR, Evans IM, Meyer LH, Walker P. A meta-analysis of intervention research with problem behavior: treatment validity and standards of practice. *Am J Ment Retard*. 1991; 96(3):233–56. PMID: 1836733
72. Schubert CA, Mulvey EP, Steinberg L, Cauffman E, Losoya SH, Hecker T, et al. Operational lessons from the Pathways to Desistance project. *Youth Violence Juv Justice*. 2004. <https://doi.org/10.1177/1541204004265875> PMID: 20119515
73. Asscher JJ, Dutch MST Cost-Effectiveness Study Group<sup>4</sup>, Deković M, Manders WA, van der Laan PH, Prins PJM. A randomized controlled trial of the effectiveness of multisystemic therapy in the Netherlands: post-treatment changes and moderator effects. *J Exp Criminol*. 2013. <https://doi.org/10.1007/s11292-012-9165-9>
74. Dijkstra S, Asscher JJ, Deković M, Stams GJJM, Creemers HE. A randomized controlled trial on the effectiveness of Family Group Conferencing in child welfare: effectiveness, moderators, and level of FGC completion. *Child Maltreat*. 2019. <https://doi.org/10.1177/1077559518808221> PMID: 30463425
75. Kennedy CH. *Single-case designs for educational research*. Boston: Allyn and Bacon; 2005.
